# Supplementary material for: Catalyst and reactor design considerations for selective production of acids by oxidative cleavage of alkenes and unsaturated fatty acids with H2O2
Source: Royal Society of Chemistry journal article supplement (doi:10.1039/d2re00160h), 2022-01-01
Supplement: d2re00160h1.pdf [file d2re00160h1.pdf]

## Supporting Information

### **Catalyst and Reactor Design Considerations for Selective Production of Acids by Oxidative Cleavage of Alkenes and Unsaturated Fatty Acids with H<sub>2</sub>O<sub>2</sub>**

Danim Yun, Zhongyao Zhang and David W. Flaherty\*

DOE Center for Advanced Bioenergy and Bioproducts Innovation, University of Illinois  
at Urbana-Champaign  
Department of Chemical and Biomolecular Engineering, University of Illinois at Urbana-  
Champaign, Urbana, Illinois 61801

\*Corresponding Author

Phone: (217) 244-2816

Email: dwflhrt@illinois.edu

## S1.0. Synthesis and Characterization of the WO<sub>x</sub>-Al<sub>2</sub>O<sub>3</sub> Catalyst

### S1.1. WO<sub>x</sub>-Al<sub>2</sub>O<sub>3</sub> Catalyst Synthesis

Aluminum oxide ( $\gamma$ -Al<sub>2</sub>O<sub>3</sub>, Sigma Aldrich; 3.8 nm pores, 364 m<sup>2</sup>·g<sup>-1</sup>) was calcined in flowing air (Airgas, Ultra Zero Grade) at 823 K for 6 h to remove organic residues and moisture. The cooled solid (~1 g) was added to chloroform (80 cm<sup>3</sup>; CHCl<sub>3</sub>, TCI Chemical,  $\geq 99.0\%$ ) in a two-neck round-bottom flask under Ar (Airgas, 99.999%) flow in a glass air-free apparatus. The mixture was stirred for 0.5 h (300 rpm, ~295 K), after which the designated amount of bis(cyclopentadienyl)tungsten dichloride ((C<sub>5</sub>H<sub>5</sub>)<sub>2</sub>WCl<sub>2</sub>, Alfa Aesar, 99%) was added as a dry powder to a suspension of alumina in CHCl<sub>3</sub>. The mixture was stirred under continuous Ar purge for 0.5 h. Three equivalents of triethylamine ((C<sub>2</sub>H<sub>5</sub>)<sub>3</sub>N, Sigma-Aldrich, 99.5%) were added to the mixture to deprotonate sites surface hydroxyls and adsorb (C<sub>5</sub>H<sub>5</sub>)<sub>2</sub>WCl<sub>2</sub>. The mixture was stirred for another 12 h. Subsequently, the solids were filtered, dried, and calcined at 823 K for 6 h in flowing air (100 cm<sup>3</sup>·min<sup>-1</sup>; Airgas, Ultra Zero Grade) to form tungsten oxide complexes (WO<sub>x</sub>) on the alumina. The resulting WO<sub>x</sub>-Al<sub>2</sub>O<sub>3</sub> materials were characterized (*vide infra*) by EDXRF and adsorption and desorption isotherms of N<sub>2</sub>. The mass loading and the areal density of W atoms on the Al<sub>2</sub>O<sub>3</sub> support for the WO<sub>x</sub>-Al<sub>2</sub>O<sub>3</sub> catalyst are 3.6% and 0.4 W·nm<sup>-2</sup>, respectively.

### S1.2. Characterization of $\text{WO}_x\text{-Al}_2\text{O}_3$ Catalyst

Adsorption and desorption isotherms of  $\text{N}_2$  were performed using a Micrometrics 3Flex analyzer and SmartVac degasser. Catalyst ( $< 50$  mg) was loaded into a glass vessel and heated under vacuum to desorb water and organic residues. The degassed sample was weighed and the isotherms were then obtained. The  $\text{N}_2$  adsorption-desorption isotherm of  $\gamma\text{-Al}_2\text{O}_3$  calcined at 823 K for 6 h shows a type IV isotherm with H1-type hysteresis. The total surface areas of these samples were determined to be  $281 \text{ m}^2\cdot\text{g}^{-1}$  using the BET method.

*In situ* Raman spectroscopy was used to examine the structure of tungsten oxide domains in the dehydrated catalysts. Raman spectra of the dehydrated catalysts were obtained from catalyst pellets placed in an environmentally controlled high-temperature cell reactor (Linkam, CCR1000). Before analysis, the catalysts were dehydrated at 823 K for 1 h in flowing  $\text{O}_2$  (Airgas, ultrahigh purity,  $20 \text{ cm}^3 \text{ min}^{-1}$ ) to desorb adsorbed moisture. The spectra were collected after cooling the catalyst to room temperature under flowing  $\text{O}_2$  gas ( $20 \text{ cm}^3 \text{ min}^{-1}$ ). Spectra were acquired with a Raman spectrometer (Renishaw, inVia) equipped with a 532 nm laser at less than  $41 \text{ mW}\cdot\mu\text{m}^{-2}$  at the catalyst surface. The power density was measured directly using a portable power meter (Gentec-EO, PRONTO-SI).

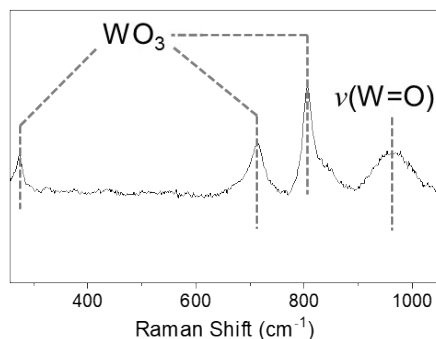

**Fig. S1** *In situ* Raman spectra of  $\text{WO}_x\text{-Al}_2\text{O}_3$  under dry flowing helium (298 K, 101 kPa He) after dehydration (773 K, 1 h,  $20 \text{ cm}^3\cdot\text{min}^{-1}$ ). Reprinted (adapted) with permission from D. Yun *et al.*, ACS Catal. 2021, 11, 5, 3137–3152. Copyright 2022 American Chemical Society.

Figure S1 shows steady-state Raman spectra of the catalysts under dehydrated condition. Raman spectra of dehydrated  $\text{WO}_x\text{-Al}_2\text{O}_3$  contains features at 274, 719, 809, assigned to  $\delta(\text{O-W-O})$ ,  $\nu(\text{W-O})$ , and  $\nu(\text{O-W-O})$  modes, respectively, of the monoclinic  $\text{WO}_3$  structure,<sup>S1</sup> and  $953 \text{ cm}^{-1}$  correspond to the  $\nu(\text{W=O})$  of distorted monotungstate.<sup>S2,S3</sup> The results suggest that the  $\text{WO}_x\text{-Al}_2\text{O}_3$  catalyst contains oligomeric tungstate surface species and  $\text{WO}_3$  aggregates under dehydrated condition.

**S2.0. Concentration profiles of the reactant and the products after separating the heterogeneous catalyst from the reaction solution or after cooling down the reaction solution with homogeneous catalyst to room temperature**

**S2.1. Concentration profiles of 4-octene, 4,5-epoxyoctane, and butanal in the reaction solution with homogeneous catalysts during a reaction and after cooling it down to room temperature**

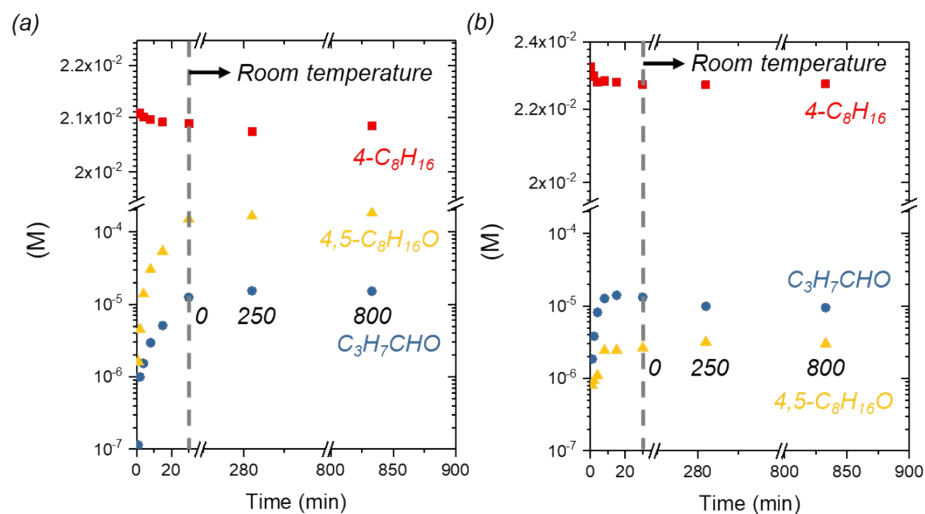

**Fig. S2** 4-Octene, 4,5-epoxyoctane, and butanal concentrations in the reaction solutions during a reaction (21 to 23 mM  $4-C_8H_{16}$ , 0.1 M  $H_2O_2$ , and 0.39 M  $H_2O$  in  $CH_3CN$ ) with (a)  $H_2WO_4$  and (b) W-POM catalysts at 333 K, and after cooling to room temperature, as a function of time

Figure S2 shows that the reactant and the products concentrations are nearly constant in the reaction solutions after cooling to room temperature. Thus, we assume that the oxidative cleavage reaction with homogeneous catalysts ends once the temperature reaches room temperature.

## S2.2. Hot Filtration Test

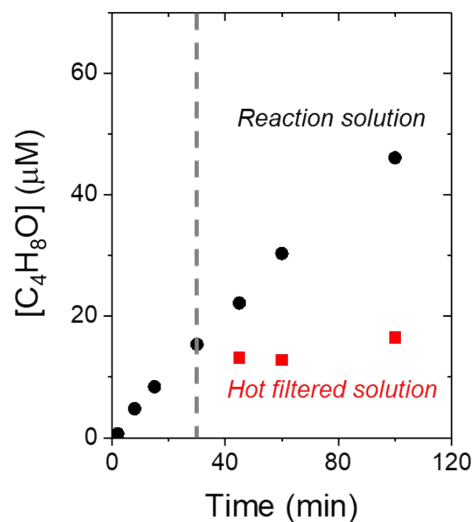

**Fig. S3** Butanal concentrations of (●) non-filtered reaction solution and (■) hot filtered solution as a function of reaction time (22 mM 4-C<sub>8</sub>H<sub>16</sub>, 0.1 M H<sub>2</sub>O<sub>2</sub>, 0.39 M H<sub>2</sub>O in CH<sub>3</sub>CN) over WO<sub>x</sub>-Al<sub>2</sub>O<sub>3</sub> at 333 K

To determine if catalytically active forms of WO<sub>x</sub> leach from the alumina support, we carried out hot filtration tests for WO<sub>x</sub>-Al<sub>2</sub>O<sub>3</sub> catalyst. Hot filtered solutions do not show any change in butanal concentration (Figure S3), indicating that active WO<sub>x</sub> species do not leach from the alumina support under these conditions, and the oxidative cleavage reaction with heterogeneous catalysts ends once the catalyst is separated from the reaction solution.

### S3.0. Derivation of reactor design and component generation rate equations in the oxidative cleavage of 4-octene

#### S3.1. Reactor Design Equations

We assumed that mass transfer is negligible, and there is one homogeneous phase in a batch or semibatch reactor due to vigorous stirring. In the case of the semibatch reactor, the volumes were assumed additive, which implies that a simple update formula for the liquid volume ( $V_L$ ) is applied,

$$V_L = V_{0L} + V't \quad (S1)$$

where  $V_{0L}$  is the initial volume and  $V'$  is the volumetric flow rate of aqueous hydrogen peroxide solution. The mass balance equation for an arbitrary component can be written as

$$n'_{0i} + r_i m_{cat} = \frac{dn_i}{dt} \quad (S2)$$

where  $n'_{0i}$  is the molar flow rate of component  $i$  in the feed ( $n'_{0i} \neq 0$  for hydrogen peroxide and water, but  $n'_{0i} = 0$  for the other components),  $n_i$  is the moles of substance  $i$  in the reactor and  $m_{cat}$  is the mass of the catalyst. The term  $r_i$  denotes the catalytic generation rate of the component  $i$ . The moles of substance ( $n_i$ ) can be elaborated further, because  $n_i = C_i V_L$ . Differentiation gives:

$$\frac{dn_i}{dt} = \frac{d(C_i V_L)}{dt} = \frac{dC_i}{dt} V_L + C_i \frac{dV_L}{dt} \quad (S3)$$

According to Equation (S1),  $dV_L/dt = V'$ . After inserting these relations into the balance Equation (S3), the mass balance becomes

$$\frac{dC_i}{dt} V_L + C_i \frac{dV_L}{dt} = C_{0i} V' + r_i m_{cat} \quad (S4)$$

$$\frac{dC_i}{dt} = (C_{0i} - C_i) \frac{V'}{V_L} + r_i \frac{m_{cat}}{V_L} \quad (S5)$$

Equation (S5) describes the changes of the concentrations of semibatch components.

For a batch reaction, there is no liquid volume change (e.g.  $V_L = V_{0L}$ ,  $V' = 0$ ) and all component concentrations in the feed are zero (e.g.  $n'_{0i} = 0$ ). Therefore, the mass balance and the reactor design equations are, respectively:

$$r_i m_{cat} = \frac{dn_i}{dt} \quad (S6)$$

$$\frac{dC_i}{dt} = r_i \frac{m_{cat}}{V_{0L}} \quad (S7)$$

Equation (S7) describes the changes of the concentrations of batch components.

### S3.2. Component generation rates

#### a. Oxidative cleavage of alkenes

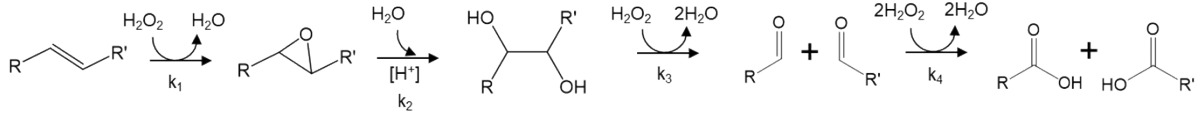

#### b. Decomposition of hydrogen peroxide

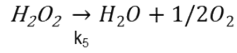

Scheme 1. Stoichiometric reactions involved in the oxidative cleavage of alkenes with  $H_2O_2$  and decomposition of  $H_2O_2$ .

For the oxidative cleavage reaction, the generation rates of each component are obtained as linear combinations of  $r_1$  through  $r_5$ . Therefore, the generation rates for each component are:

$$r_{4-C_8H_{16}} = -r_1 \quad (S8)$$

$$r_{4,5-C_8H_{16}O} = r_1 - r_2 \quad (S9)$$

$$r_{4,5-C_8H_{16}(OH)_2} = r_2 - r_3 \quad (S10)$$

$$r_{C_3H_7CHO} = 2r_3 - r_4 \quad (S11)$$

$$r_{C_3H_7COOH} = r_4 \quad (S12)$$

$$r_{H_2O_2} = -r_1 - r_3 - r_4 - r_5 \quad (S13)$$

#### S4.0. W content confirmation

##### S4.1. Atomic W confirmation in the reaction mixture after oxidative cleavage of oleic acid with $\text{H}_2\text{O}_2$ on homogeneous catalyst

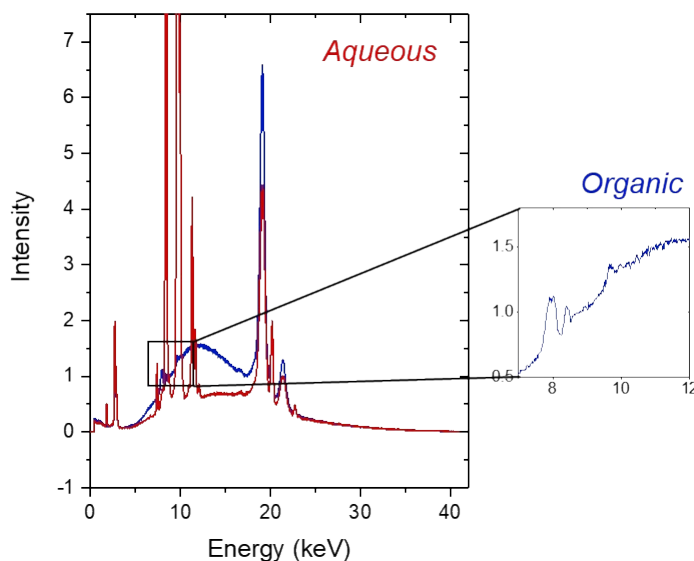

**Fig. S4** EDXRF signals for the organic (blue) and aqueous phases (red) of the oxidative cleavage reaction mixture (0.95 M OA, 6.85 M  $\text{H}_2\text{O}_2$ , 27.1 M  $\text{H}_2\text{O}$ , 343 K) on W-POM catalyst

Figure S4 shows EDXRF spectra of the organic and aqueous phases of the reaction mixture when we use W-POM as a catalyst. Except the peaks attributed to Rh and Cu originating from the laser source, the peaks at 8.4, 9.7, and 10 keV can be attributed to W  $L_\alpha$ , W  $L_{\beta 1}$ , and W  $L_{\beta 2}$ , respectively. Most of W-POM catalyst is dissolved in the aqueous phase after the reaction (92%) and a small amount of W-POM remains in the organic phase (0.3%), indicating that complete separation of the homogeneous catalysts from the reaction mixture is challenging.



#### S4.2. Atomic W confirmation in the used $\text{WO}_x\text{-Al}_2\text{O}_3$ catalysts as a function of $\text{H}_2\text{O}_2$ concentration

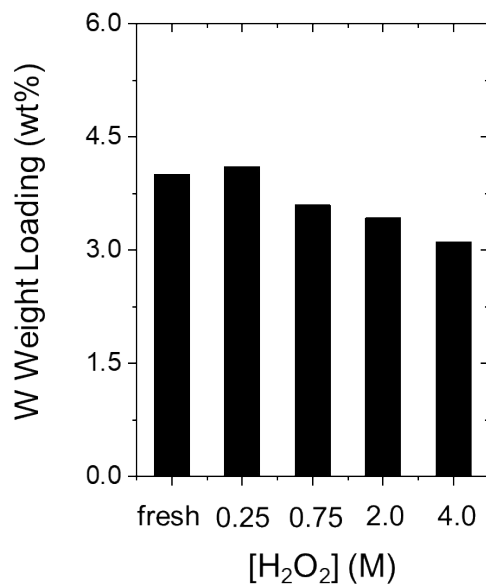

**Figure S5.** W weight loading of fresh and used  $\text{WO}_x\text{-Al}_2\text{O}_3$  catalysts after the  $\text{H}_2\text{O}_2$  treatment (0.25-4 M  $\text{H}_2\text{O}_2$ , 1-16 M  $\text{H}_2\text{O}$  in  $\text{CH}_3\text{CN}$ , 333 K, 1 h) measured by EDXRF

We measured the quantity of W atoms remaining upon the  $\text{Al}_2\text{O}_3$  following contact with  $\text{H}_2\text{O}_2$  solutions of different concentrations (0.25–4.00 M  $\text{H}_2\text{O}_2$ , 1–16 M  $\text{H}_2\text{O}$  in  $\text{CH}_3\text{CN}$ ) at 333 K for 1 h. The W atom content remains unchanged when  $[\text{H}_2\text{O}_2]$  remains equal to or lower than 0.25 M  $\text{H}_2\text{O}_2$ , but increasingly quantities of W atoms leach from the support as  $[\text{H}_2\text{O}_2]$  increases from 0.75 M (10% W lost) to 4.0 M (22% W lost).

### S4.3. Regeneration of $\text{WO}_x\text{-Al}_2\text{O}_3$ catalyst in batch and semibatch operations

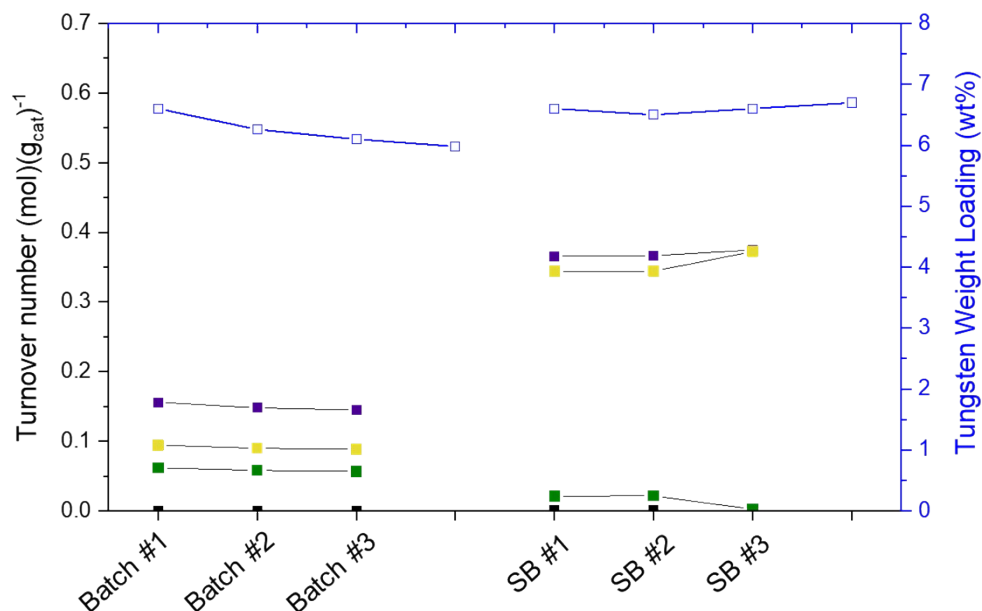

**Figure S6.** Tungsten weight loading of fresh and regenerated  $\text{WO}_x\text{-Al}_2\text{O}_3$  catalysts and turnover number for consumed alkenes (■) and formed epoxides (■), diols (■), and oxidative cleavage products (■, aldehydes and acids) during recycle test (50 mM 4-octene, 0.5 M  $\text{H}_2\text{O}_2$ , 1.98 M  $\text{H}_2\text{O}$  in  $\text{CH}_3\text{CN}$ , 333K for batch or 50 mM 4-octene in  $\text{CH}_3\text{CN}$ , 333K,  $F_{\text{H}_2\text{O}_2}=1.3 \mu\text{L min}^{-1}$  for semibatch operations) over  $\text{WO}_x\text{-Al}_2\text{O}_3$ .

To confirm the reusability of  $\text{WO}_x\text{-Al}_2\text{O}_3$  catalyst in batch and semibatch operations, we conducted four subsequent reactions. EDXRF results show that 9.4% of W leaches from the support after three sequential BSTR operation (50 mM 4-octene, 0.5 M  $\text{H}_2\text{O}_2$ , 1.98 M  $\text{H}_2\text{O}$  in  $\text{CH}_3\text{CN}$ , 333K), while W does not leach from the  $\text{Al}_2\text{O}_3$  after SBR operation (50 mM 4-octene in  $\text{CH}_3\text{CN}$ , 333K,  $F_{\text{H}_2\text{O}_2}=1.3 \mu\text{L min}^{-1}$ ). The turnover numbers slightly decrease (~7%) after three sequential BSTR operation, but turnover numbers consistently maintain for all three semibatch reactions. This demonstrates that the  $\text{WO}_x\text{-Al}_2\text{O}_3$  catalysts are stable and regenerable during semibatch operation.

**S5.0. Derivation of ratio of oxidative cleavage rate to H<sub>2</sub>O<sub>2</sub> decomposition rate over tungstates and [M-H<sub>2</sub>O<sub>2</sub>\*] formed by H<sub>2</sub>O<sub>2</sub> adsorption and activation on empty active site**

**S5.1. Derivation of Rate Expressions for the oxidative cleavage of alkene with H<sub>2</sub>O<sub>2</sub> and H<sub>2</sub>O<sub>2</sub> decomposition over tungstates**

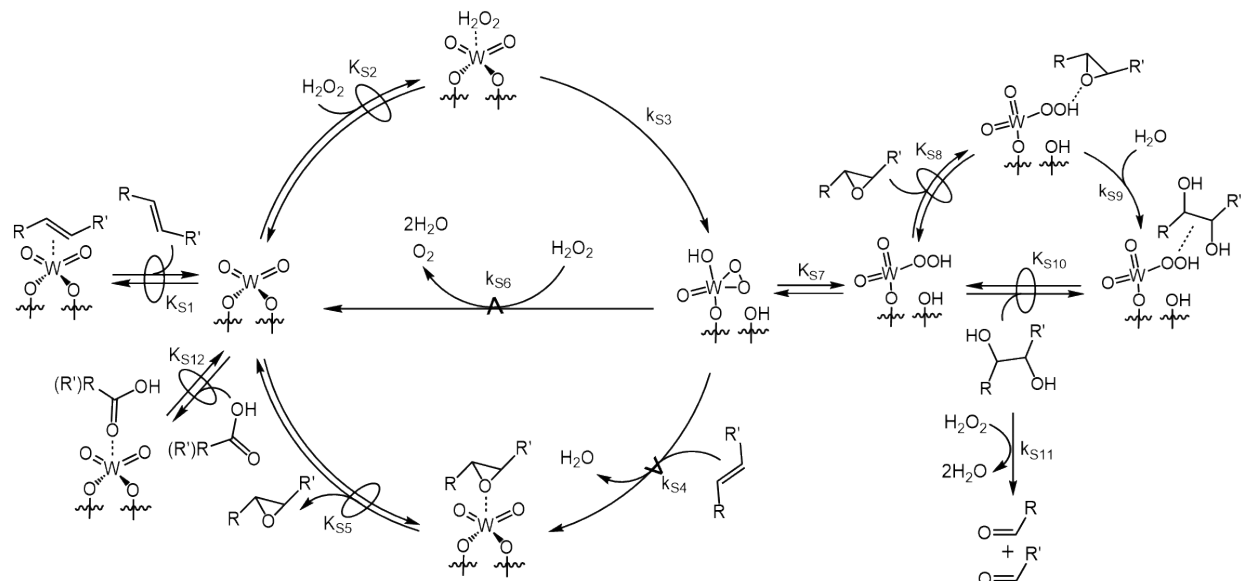

**Scheme S2.** Proposed mechanism for oxidative cleavage of alkene with H<sub>2</sub>O<sub>2</sub> and H<sub>2</sub>O<sub>2</sub> decomposition over tungstates. The  $\rightleftharpoons$  symbol denotes a quasi-equilibrated step and the  $\star$  symbol signifies the kinetically relevant steps for the formation of distinct products. Reprinted (adapted) with permission from D. Yun *et al.*, ACS Catal. 2021, 11, 5, 3137–3152. Copyright 2022 American Chemical Society.

Scheme S2 illustrates a series of elementary steps beginning with the quasi-equilibrated adsorption of alkene (step S1) and hydrogen peroxide, H<sub>2</sub>O<sub>2</sub> (step S2) which is followed by the irreversible activation of H<sub>2</sub>O<sub>2</sub> to form M-( $\eta^2$ -O<sub>2</sub>) (step S3). Activation of H<sub>2</sub>O<sub>2</sub> can result in H<sub>2</sub>O<sub>2</sub> decomposition (step S6) or kinetically relevant epoxidation (step S4) by reacting with a H<sub>2</sub>O<sub>2</sub> molecule or alkene molecule, respectively. The epoxyoctane desorbs in a quasi-equilibrated manner (step S5) and Brønsted acids of W-O-O-H complexes protonate and bind the epoxide. Subsequently, the protonated intermediate reacts with water to irreversibly hydrolyze the epoxide and form the epoxyoctanediol (step S9), which desorbs (step S10). Finally, the epoxyoctanediol is converted to an alpha-hydroxy ketone intermediate by reaction with the basic solvent and then cleaves the C-C bonds following nucleophilic attack of H<sub>2</sub>O<sub>2</sub> in the liquid-phase (step S11).

The epoxidation of 4-octene represents the kinetically relevant step that determines rates of oxidative cleavage

$$r_{OC} = k_{S4}[W - (\eta^2 - O_2)][C_8H_{16}] \quad (S14)$$

Applying the pseudo-steady state hypothesis to W-( $\eta^2$ -O<sub>2</sub>) and W-O-O-H intermediates, produces Equation S15:

$$\frac{d[W - (\eta^2 - O_2)]}{dt} \approx 0 = k_{S3}[H_2O_2 *] - k_{S4}[C_8H_{16}][W - (\eta^2 - O_2)] - k_{S6}[H_2O_2][W - (\eta^2 - O_2)] \quad (S15)$$

where  $k_{Sx}$  represents the rate constant for step Sx, [W-( $\eta^2$ -O<sub>2</sub>)] is the number of W-( $\eta^2$ -O<sub>2</sub>) and W-O-O-H, [H<sub>2</sub>O<sub>2</sub>\*] is the number of H<sub>2</sub>O<sub>2</sub> molecules bound to active sites, and all other species within brackets ([ ]) are the corresponding

liquid-phase concentrations. When  $H_2O_2$  adsorption is assumed to be quasi-equilibrated (step S2, Scheme S1), Equation S14 can be rearranged to yield:

$$[W - (\eta^2 - O_2)] = \frac{k_{S3}K_{S2}[H_2O_2][*]}{k_{S4}[C_8H_{16}] + k_{S6}[H_2O_2]} \quad (S16)$$

where [\*] is the number of unoccupied (or solvent-covered) active sites. This equation is then combined with equation (S14) to yield

$$\frac{r_{OC}}{[L]} = \frac{\frac{k_{S3}k_{S4}K_{S2}[4 - C_8H_{16}][H_2O_2]}{k_{S4}[4 - C_8H_{16}] + k_{S6}[H_2O_2]}}{1 + K_{S1}[4 - C_8H_{16}] + K_{S2}[H_2O_2] + \frac{k_3K_2[H_2O_2]}{k_{S4}[4 - C_8H_{16}] + k_{S6}[H_2O_2]} + \frac{[4,5 - C_8H_{16}O]}{K_{S5}} + K_{S11}[C_4H_8O] + K_{S12}[C_4H_8O_2]} \quad (S17)$$

where [L] is the total number of active sites and  $K_{Sx}$  is the equilibrium constant for step Sx in Scheme S1. The five terms in the denominator signify the numbers of sites that are occupied by  $CH_3CN$ , 4- $C_8H_{16}$ ,  $H_2O_2$ ,  $W-(\eta^2-O_2)$  and  $W-OOH$ , 4,5- $C_8H_{16}O$ , butanal, and butanoic acid, respectively.

Similarly, the reaction between  $W-(\eta^2-O_2)$  and  $H_2O_2$  determines  $H_2O_2$  decomposition rates ( $r_D$ )

$$r_D = k_{S6}[H_2O_2][W - (\eta^2 - O_2)] \quad (S18)$$

The application of pseudo-steady state hypothesis on  $[W-(\eta^2-O_2)]$  leads to equation S18 to be restated as:

$$\frac{r_D}{[L]} = \frac{\frac{k_{S3}k_{S6}K_{S2}[H_2O_2]^2}{k_{S4}[4 - C_8H_{16}] + k_{S6}[H_2O_2]}}{1 + K_{S1}[4 - C_8H_{16}] + K_{S2}[H_2O_2] + \frac{k_{S3}K_{S2}[H_2O_2]}{k_{S4}[4 - C_8H_{16}] + k_{S6}[H_2O_2]} + \frac{[4,5 - C_8H_{16}O]}{K_{S5}} + K_{S11}[C_4H_8O] + K_{S12}[C_4H_8O_2]} \quad (S19)$$

From equations S17 and S19, the rate ratio of oxidative cleavage to  $H_2O_2$  decomposition is obtained:

$$\frac{r_{OC}}{r_D} = \frac{\frac{k_{S3}k_{S4}K_{S2}[4 - C_8H_{16}][H_2O_2]}{k_{S4}[4 - C_8H_{16}] + k_{S6}[H_2O_2]}}{\frac{k_{S3}k_{S6}K_{S2}[H_2O_2]^2}{k_{S4}[4 - C_8H_{16}] + k_{S6}[H_2O_2]}} = \frac{k_{S4}[4 - C_8H_{16}]}{k_{S6}[H_2O_2]} \quad (S20)$$

### S5.2. Derivation of $[H_2O_2-M^*]$ for the $H_2O_2$ adsorption and activation on metals

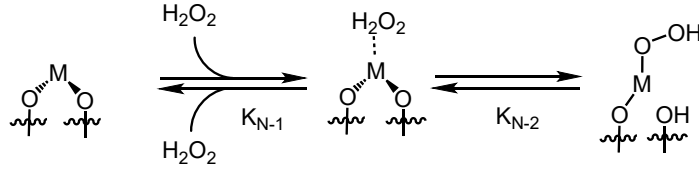

**Scheme S3** The  $H_2O_2$  activation mechanism on metals.

Scheme S3 illustrates elementary steps equilibrating adsorption (step N-1) and activation (step N-2) of  $H_2O_2$  on the metal sites. The concentration of  $H_2O_2$ -adsorbed site ( $[H_2O_2^*]$ ) is relating to the fractional occupancy of  $H_2O_2$  onto the empty active sites, and the equilibrium reaction between empty site (\*) and  $H_2O_2$ -adsorbed site ( $H_2O_2^*$ ) yields Equation S21:

$$[H_2O_2^*] = \frac{K_{N-1}[H_2O_2]}{1 + K_{N-1}[H_2O_2]} \quad (S21)$$

Where  $K_{H1}$  is the equilibrium constant for step N-1 in Scheme S2.

Similarly, the equilibrium reaction between  $H_2O_2$ -adsorbed site ( $H_2O_2^*$ ) and  $H_2O_2$ -activated metal site ( $H_2O_2-M^*$ ) gives Equation S22:

$$[H_2O_2-M^*] = \frac{K_{N-2}[H_2O_2^*]}{1 + K_{N-2}[H_2O_2^*]} \quad (S22)$$

Equation (S21) is substituted into Equation (S22) provides Equation S23:

$$[H_2O_2-M^*] = \frac{K_{N-1}K_{N-2}[H_2O_2]}{1 + (K_{N-2} + 1)K_{N-1}[H_2O_2]} \quad (S23)$$

We can assume that the activation of  $H_2O_2$  (step N-2) is irreversible ( $K_{N-2} \gg 1$ ,  $K_N = K_{N-1}K_{N-2}$ ), which yields Equation S24:

$$[H_2O_2-M^*] = \frac{K_{N-1}K_{N-2}[H_2O_2]}{1 + K_{N-1}K_{N-2}[H_2O_2]} = \frac{K_N[H_2O_2]}{1 + K_N[H_2O_2]} \quad (S24)$$

### S5.3. Derivation of $[W-(\eta^2-O_2)]$ for the $H_2O_2$ adsorption and activation on W

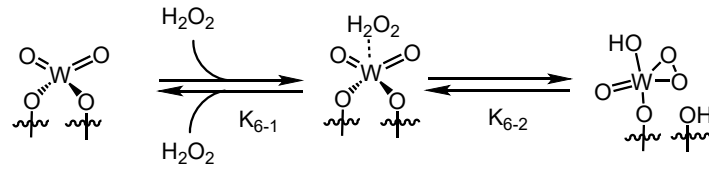

**Scheme S4** The  $H_2O_2$  activation mechanism on W to form  $W-(\eta^2-O_2)$ .

In the similar way (S21 through S24) in S5.2, we obtain Equation S25 with the assumption that  $H_2O_2$  is activated on W sites irreversibly.

$$[W - (\eta^2 - O_2)] = \frac{K_{6-1}K_{6-2}[H_2O_2]}{1 + K_{6-1}K_{6-2}[H_2O_2]} = \frac{K_6[H_2O_2]}{1 + K_6[H_2O_2]} \quad (S25)$$

#### S5.4. Derivation of [W-OOH] for the H<sub>2</sub>O<sub>2</sub> adsorption and activation on W

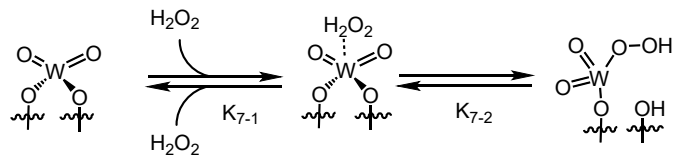

**Scheme S5** The H<sub>2</sub>O<sub>2</sub> activation mechanism on W to form W-OOH.

In the similar way (S21 through S24) in S5.2, we obtain Equation S26 with the assumption that H<sub>2</sub>O<sub>2</sub> is activated on W sites irreversibly.

$$[W - OOH] = \frac{K_{7-1}K_{7-2}[H_2O_2]}{1 + K_{7-1}K_{7-2}[H_2O_2]} = \frac{K_7[H_2O_2]}{1 + K_7[H_2O_2]} \quad (S26)$$

### S5.5. Derivation of $[H_2O_2-W(or\ Al)^*]$ for the $H_2O_2$ adsorption and activation on W or Al sites

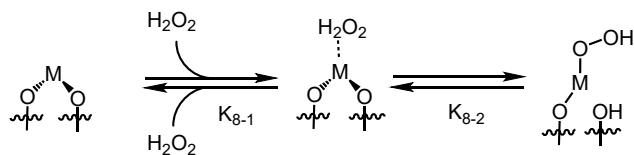

**Scheme S6** The  $H_2O_2$  activation mechanism on W or Al metals (M in scheme S6 is W or Al).

In the similar way (S21 through S24) in S5.2, we obtain Equation S27 with the assumption that  $H_2O_2$  is activated on W or Al sites irreversibly.

$$[H_2O_2 - W(or\ Al)^*] = \frac{K_{8-1}K_{8-2}[H_2O_2]}{1 + K_{8-1}K_{8-2}[H_2O_2]} = \frac{K_8[H_2O_2]}{1 + K_8[H_2O_2]} \quad (S27)$$



## S6.0. Initial rate measurements for step reactions

### S6.1. Ring-opening of 1,2-epoxyoctane

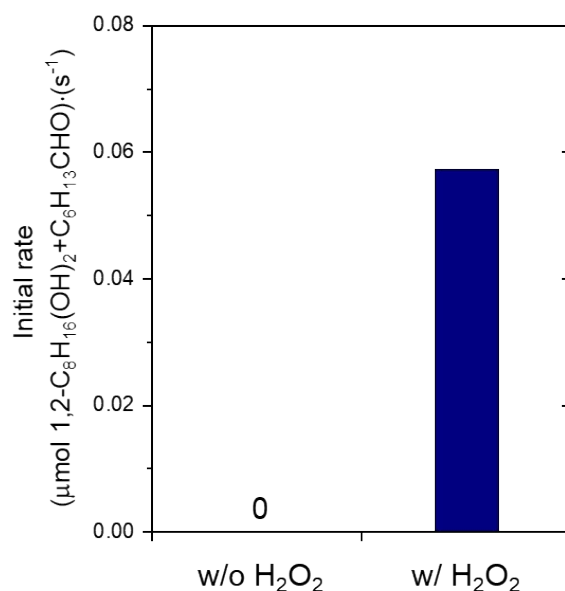

**Fig. S7** Initial rates for ring-opening of 1,2-epoxyoctane (0.025 M 1,2-C<sub>8</sub>H<sub>16</sub>O, 0.1 M or 0 M H<sub>2</sub>O<sub>2</sub>, 0.39 M H<sub>2</sub>O in CH<sub>3</sub>CN at 333 K) over WO<sub>x</sub>-Al<sub>2</sub>O<sub>3</sub> (mass loading of W is 0.5 %). Reprinted (adapted) with permission from D. Yun *et al.*, ACS Catal. 2021, 11, 5, 3137–3152. Copyright 2022 American Chemical Society.

Figure S6 shows the initial rates for the ring-opening of 1,2-epoxyoctane with H<sub>2</sub>O<sub>2</sub> and H<sub>2</sub>O or in the absence of H<sub>2</sub>O<sub>2</sub> over WO<sub>x</sub>-Al<sub>2</sub>O<sub>3</sub> catalyst (mass loading of W is 0.5 %). The ring-opening of 1,2-epoxyoctane does not show measurable rates in the absence of H<sub>2</sub>O<sub>2</sub>, which suggests this step reaction occurs on H<sub>2</sub>O<sub>2</sub>-activated W sites. The H<sub>2</sub>O<sub>2</sub>-activated complexes on W-containing catalysts include W-peroxo (W-(η<sup>2</sup>-O<sub>2</sub>)) and W-hydroperoxo (W-OOH), and Brønsted acid sites are known to activate epoxide for the ring-opening reaction. The W-OOH sites, therefore, are plausible active sites for this step.

## S6.2. Oxidative cleavage of 1,2-octanediol

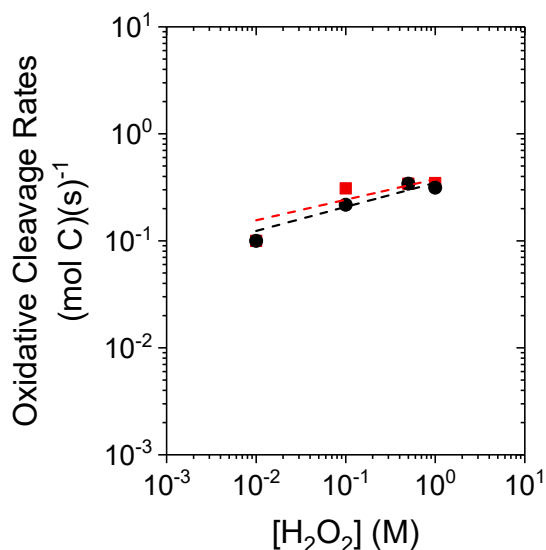

**Fig. S8** Oxidative cleavage rates (heptanal and heptanoic acid formation rates) in the oxidative cleavage of 1,2-octanediol (0.03 M  $1,2\text{-C}_8\text{H}_{16}(\text{OH})_2$  in  $\text{CH}_3\text{CN}$  at 333 K) as a function of  $[\text{H}_2\text{O}_2]$  on  $\text{WO}_x\text{-Al}_2\text{O}_3$  (●) or in the absence of the catalyst (■)

Figure S7 shows oxidative cleavage rates by oxidative cleavage of 1,2-octanediol as a function of concentration of  $\text{H}_2\text{O}_2$ . The rates of heptanal and heptanoic acid formations were used to report oxidative cleavage rates. The measured rates do not depend on the presence of the catalyst, which suggests this reaction occurs by liquid  $\text{H}_2\text{O}_2$  in aqueous  $\text{CH}_3\text{CN}$ . This agrees with proposals by Venturello et al. They described that alpha-hydroxy ketone is formed followed by C-C bond cleavage of diol by nucleophilic attack of  $\text{H}_2\text{O}_2$ . The measured rates do not depend on the  $[\text{H}_2\text{O}_2]$ , which means that the production of an alpha-hydroxy ketone represents the kinetically relevant step that determines the oxidative cleavage rates of 1,2-octanediol.

### S6.3. H<sub>2</sub>O<sub>2</sub> decomposition

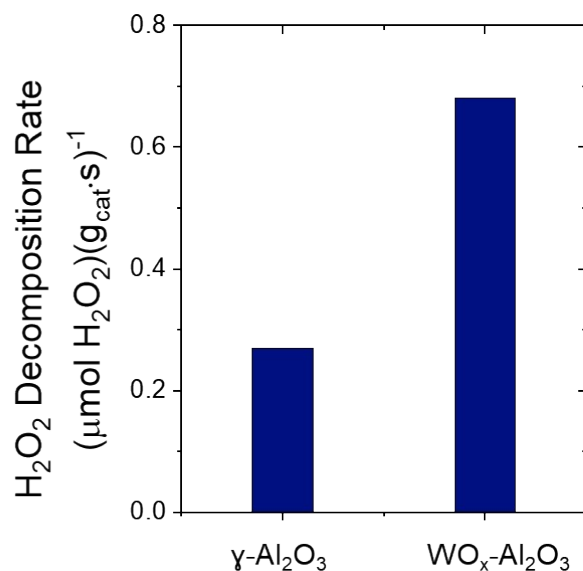

**Fig. S9** H<sub>2</sub>O<sub>2</sub> decomposition rates (10 mM H<sub>2</sub>O<sub>2</sub>, 39 mM H<sub>2</sub>O in CH<sub>3</sub>CN, 333 K) over  $\gamma$ -Al<sub>2</sub>O<sub>3</sub> and WO<sub>x</sub>-Al<sub>2</sub>O<sub>3</sub> (mass loading of W is 0.5 %). Reprinted (adapted) with permission from D. Yun *et al.*, ACS Catal. 2021, 11, 5, 3137–3152. Copyright 2022 American Chemical Society.

Figure S8 shows the turnover rates for H<sub>2</sub>O<sub>2</sub> decomposition on  $\gamma$ -Al<sub>2</sub>O<sub>3</sub> and WO<sub>x</sub>-Al<sub>2</sub>O<sub>3</sub> (mass loading of W is 0.5 %) catalysts. The measured rates show that both  $\gamma$ -Al<sub>2</sub>O<sub>3</sub> and WO<sub>x</sub>-Al<sub>2</sub>O<sub>3</sub> decomposes H<sub>2</sub>O<sub>2</sub> to form water and molecular oxygen.

### S7.0 parity and residual plots

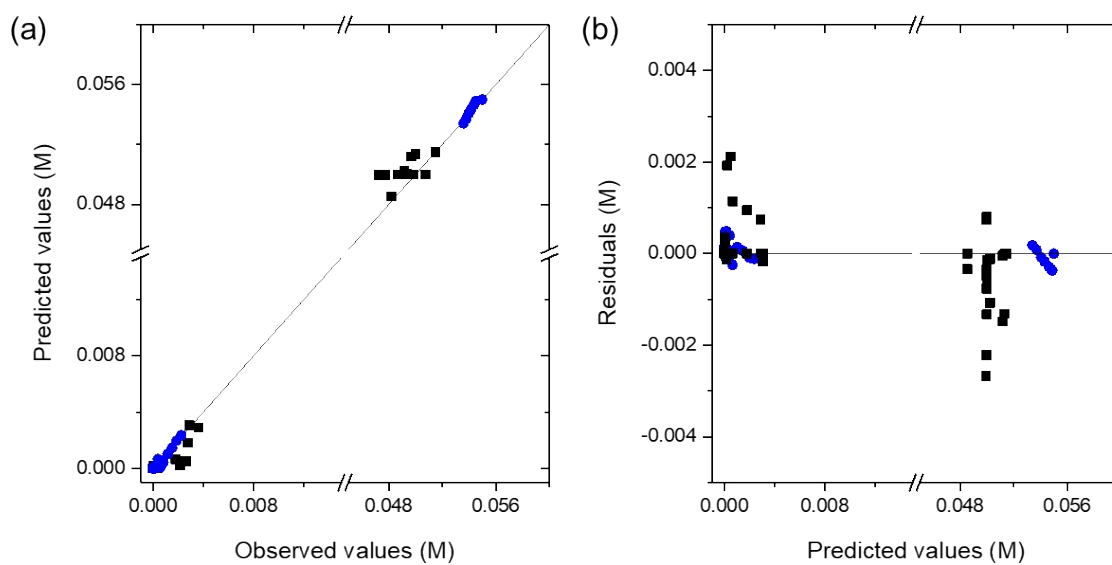

**Fig. S10** (a) Parity and (b) residual plots for batch (●) and semi-batch (■) operations

Figure S10 shows parity and residual plots for batch and semi-batch operations, which supports that the kinetic model describes in a well manner the experimental data.

## S8.0 Semibatch prediction results

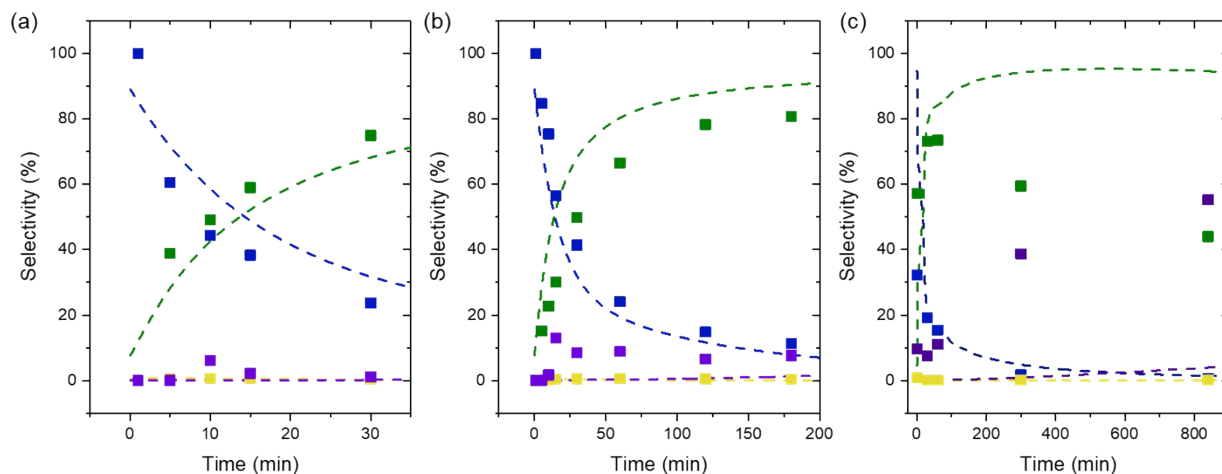

**Fig. S11** Oxidative cleavage (0.05 M 4-octene in  $\text{CH}_3\text{CN}$  at 333 K) products (4,5-epoxyoctane (■), 4,5-octanediol (■), butanal (■), butanoic acid (■)) selectivities as a function of time under semibatch conditions ( $F_{\text{H}_2\text{O}_2}$  = (a) 51, (b) 8.5, and (c)  $1.3 \mu\text{L min}^{-1}$ ): model prediction (dashed lines) and experimental data (scatter) for  $\text{WO}_x\text{-Al}_2\text{O}_3$  catalyst.

Figure S9 compares the model prediction and experiment data for oxidative cleavage products selectivities as a function of time under the different feed rate of  $\text{H}_2\text{O}_2$  ( $F_{\text{H}_2\text{O}_2}$ ) in the semibatch operation. Decrease of  $F_{\text{H}_2\text{O}_2}$  from 51 to  $1.3 \mu\text{L min}^{-1}$  increases oxidative cleavage product (the sum of butanal and butyric acid) selectivities from 70 to 99%. When we decrease  $F_{\text{H}_2\text{O}_2}$  to  $1.3 \mu\text{L min}^{-1}$ , we can see that a good fit was accomplished except the error for estimation of the oxidation of butanal to butyric acid. The possible reasons for that is explained in the manuscript section 3.4.

## S9.0 Modeling Code

%% Optimizing

```
k_ini = [2.8;502;50000;38.5;110;5000;50000;1000] ;
```

```
options = optimoptions('fmincon','Display','iter','Algorithm','sqp', 'MaxIterations',1500,...  
    'StepTolerance',1e-12, 'MaxFunEvals',1e3,'TolX',1e-25,'TolFun',1e-25,'DiffMinChange',1e-1);
```

```
k_opt = fmincon(@(k) fn_opt2(k, m_cat, fit_ii, C_i_ini), k_ini, [], [], [], [], ...  
    [0.28;50.2;5000;3.85;11.0;500;5000;100], [280;5020;500000;385;1100;50000;500000;10000], ...  
    [], options) ;
```

```
[obj, CC, ts] = fn_opt2(k_opt, m_cat, fit_ii, C_i_ini) ;
```

## References

- (S1) R.F. Garcia-Sanchez, T. Ahmido, D. Casimir, S. Baliga, and P. Misra, *J. Phys. Chem. A*, 2012, **117** (50), 13825–13831.
- (S2) N. Maity, S. Barman, Y. Minenkov, S. Ould-Chikh, E. Abou-Hamad, T. Ma, Z. S. Qureshi, L. Cavallo, V. D’Elia, and B. C. Gates *ACS Catal.* 2018, **8** (4), 2715–2729.
- (S3) E. L. Lee and I. E. Wachs, *J. Phys. Chem. C* 2007, **111** (39), 14410–14425.
